# Supplementary material for: Understanding the Dynamics of the Structural States of Cannabinoid Receptors and the Role of Different Modulators
Source: MDPI journal article supplement (doi:10.3390/life12122137), 2022-12-18
Supplement: s1 [file s1]

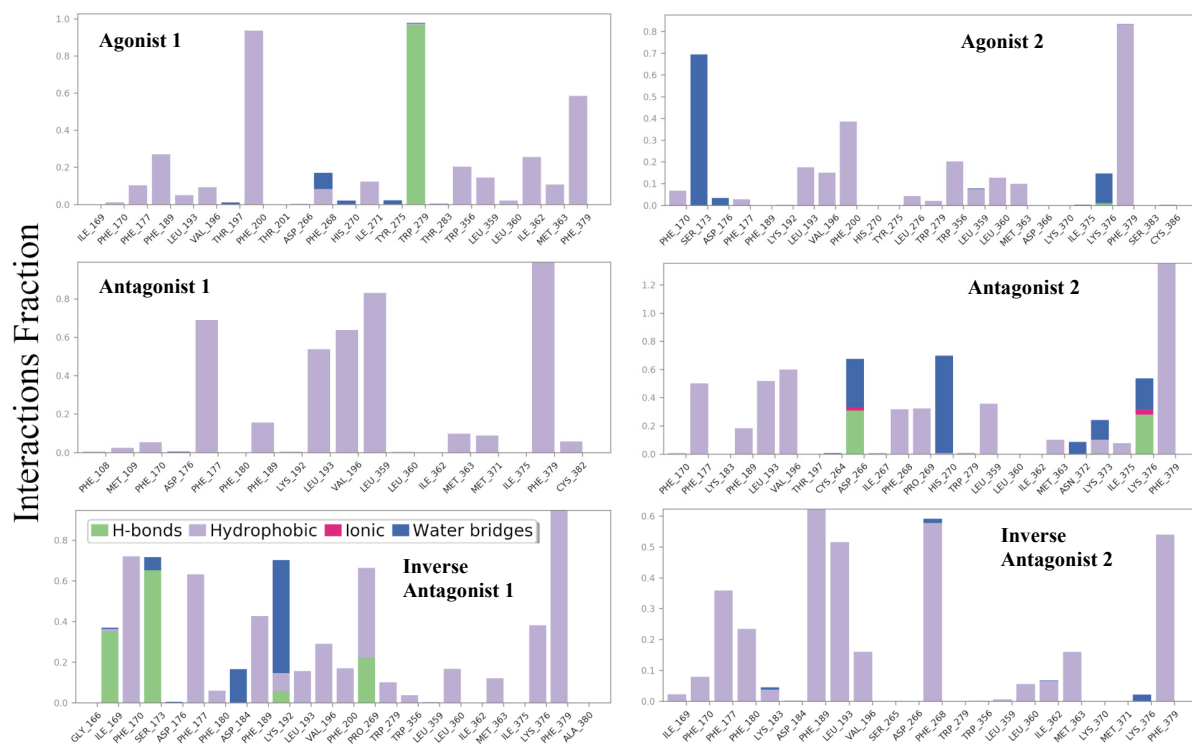

**Figure S1.** Interactions fraction of amino acid residues of intermediate CB<sub>1</sub>R states during last 100ns MD simulations with agonists, antagonists, and inverse agonists.

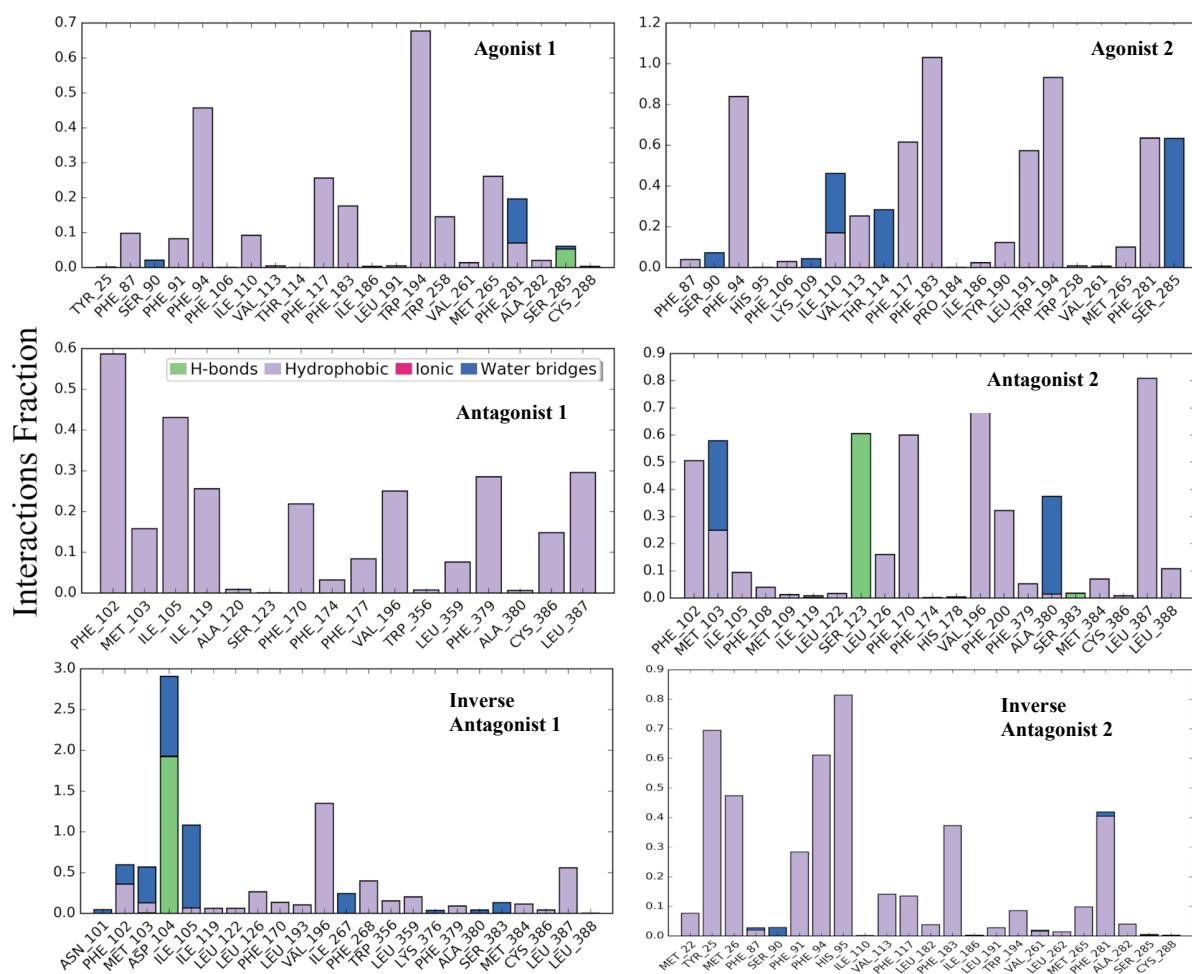

**Figure S2.** Interactions fraction of amino acid residues active and inactive CB<sub>2</sub>R states during last 100ns MD simulations with agonists, antagonists, and inverse agonists.

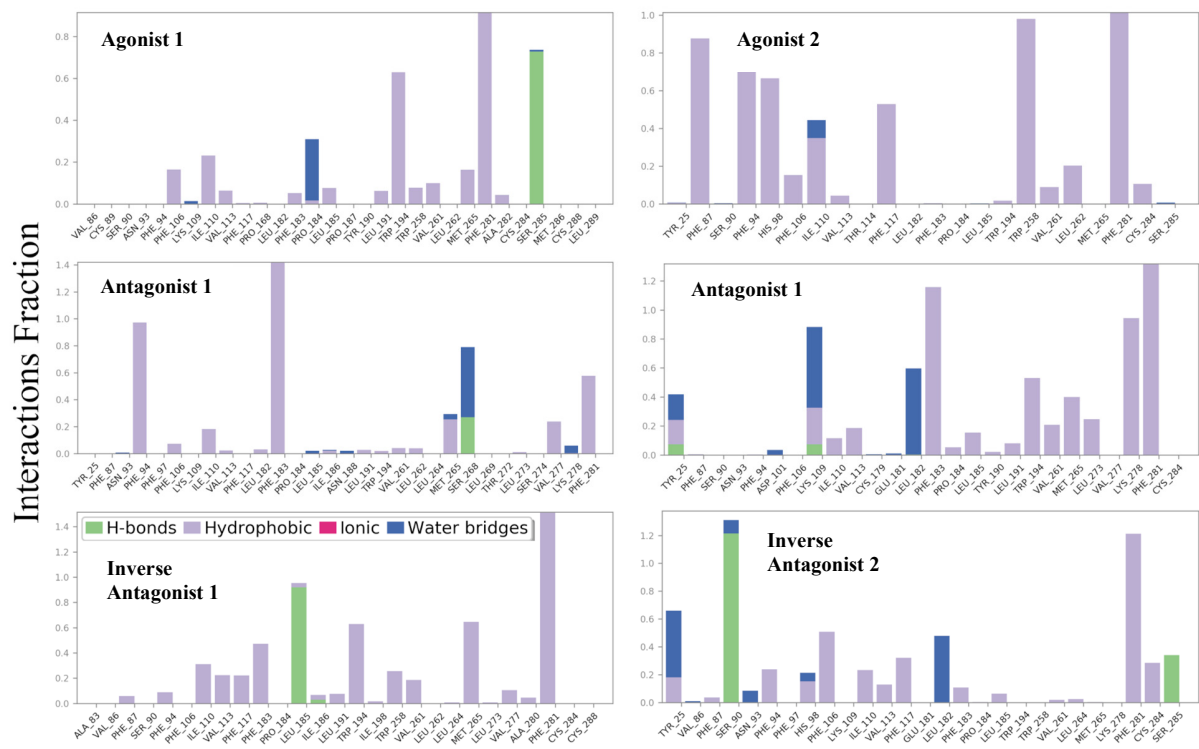

**Figure S3.** Interactions fraction of amino acid residues of intermediate CB<sub>2</sub>R states with agonists, antagonists, and inverse agonists.

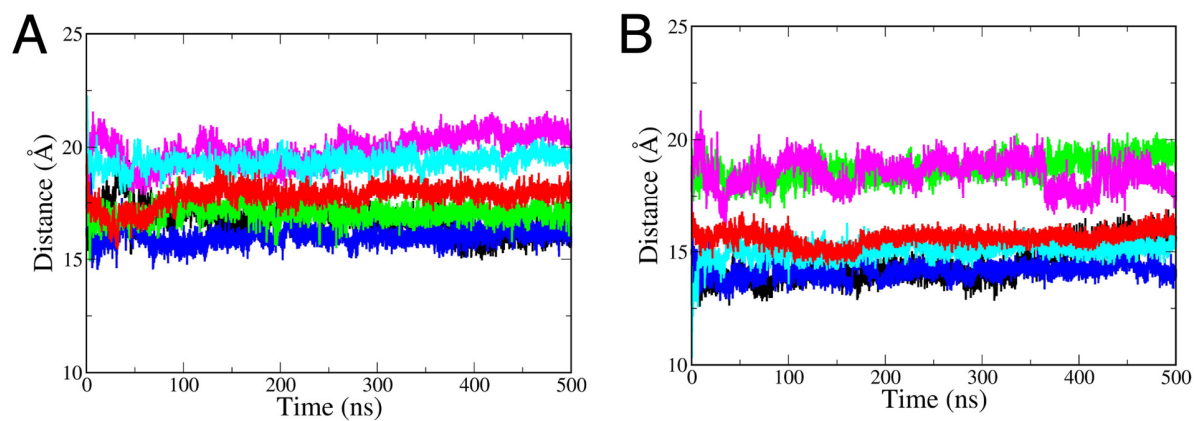

**Figure S4.** Locations of orthosteric binding sites in A) CB<sub>1</sub>R intermediate states and B) CB<sub>2</sub>R intermediate states.

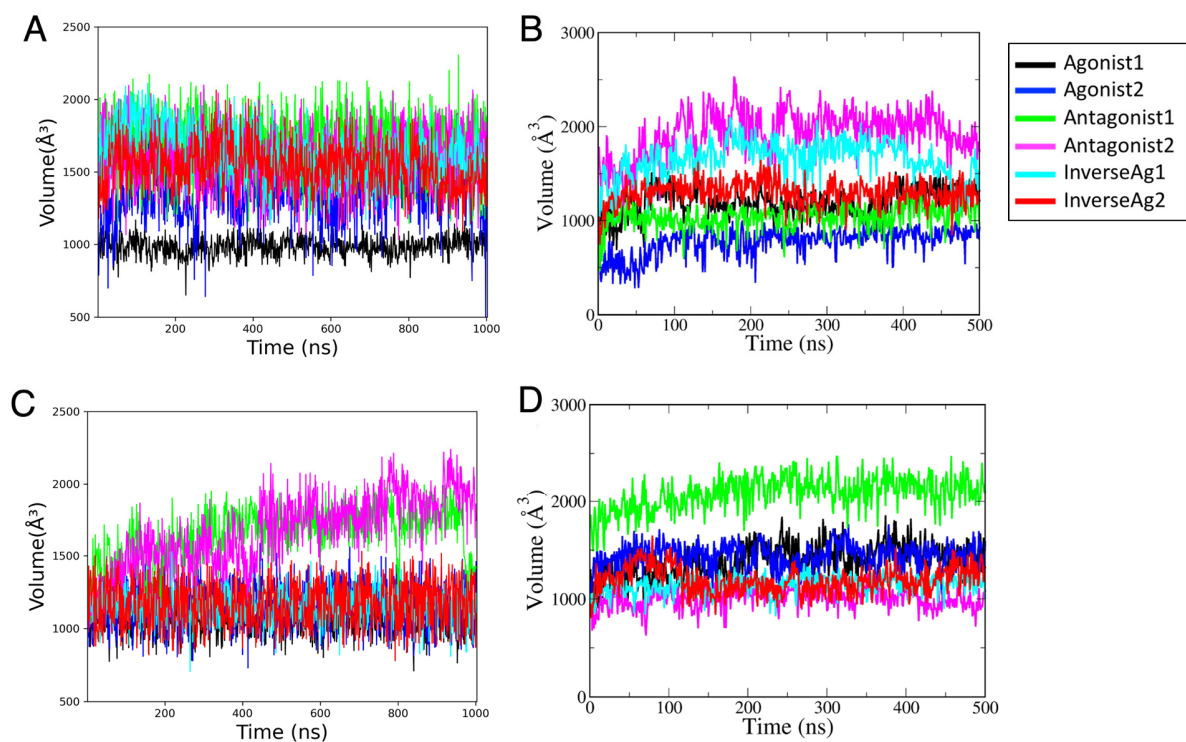

**Figure S5.** Volume of the binding site cavity for different ligand bound states of (A) CB<sub>1</sub>R active and inactive states (B) CB<sub>1</sub>R intermediate states, (C) CB<sub>2</sub>R active and inactive states, and (D) CB<sub>2</sub>R intermediate states.

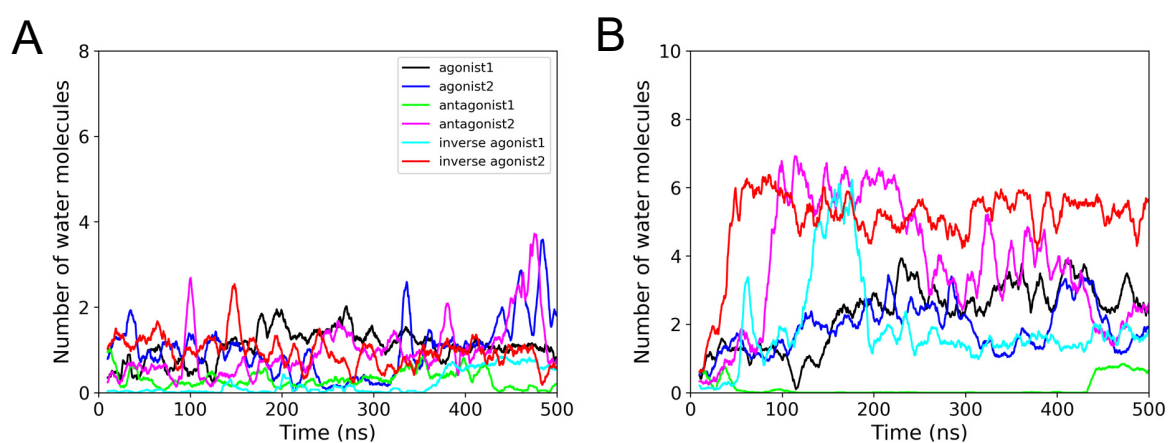

**Figure S6.** Number of internal waters in (A) CB<sub>1</sub>R and (B) CB<sub>2</sub>R intermediate states.

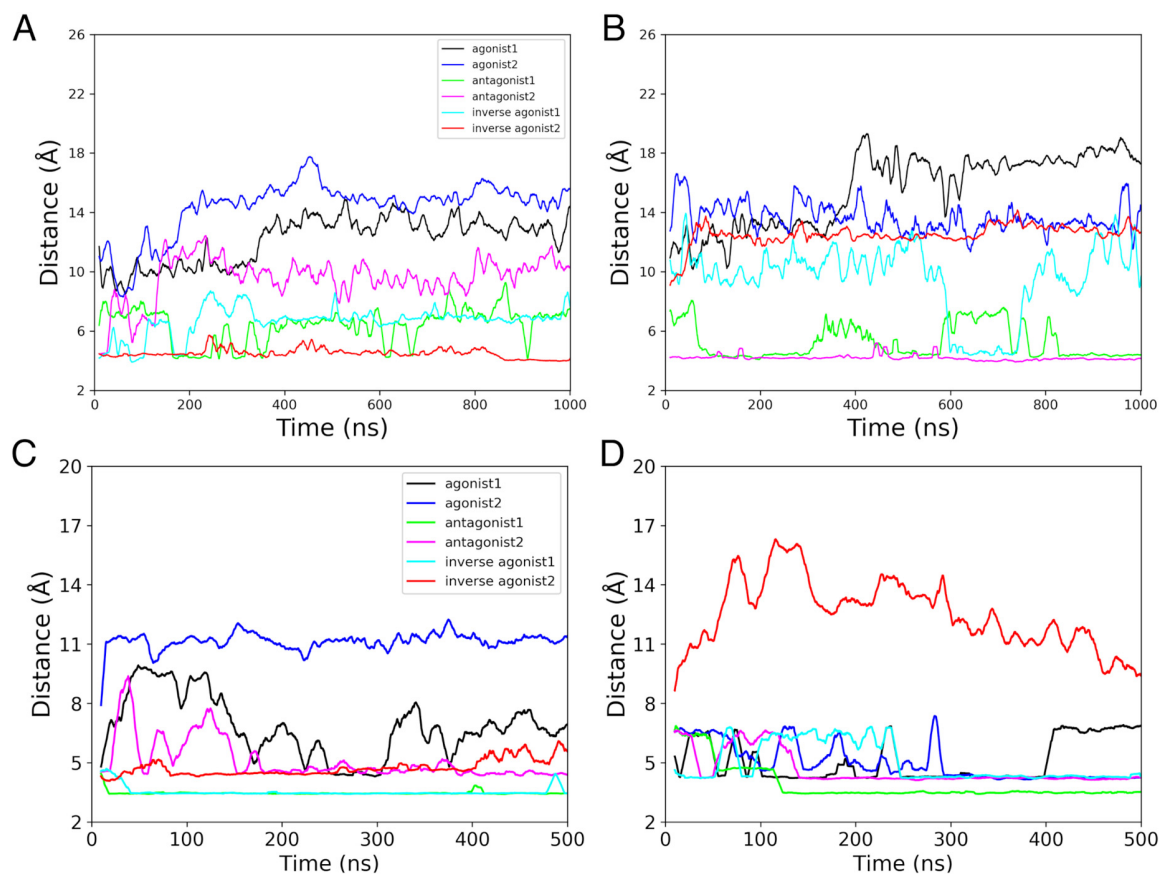

**Figure S7.** Running average for difference between COMs of Arg<sup>3.50</sup> and Asp<sup>6.30</sup> in (A) CB1 active and inactive states (B) CB1 intermediate states (C) CB2 active and inactive states and (D) CB2 intermediate states.

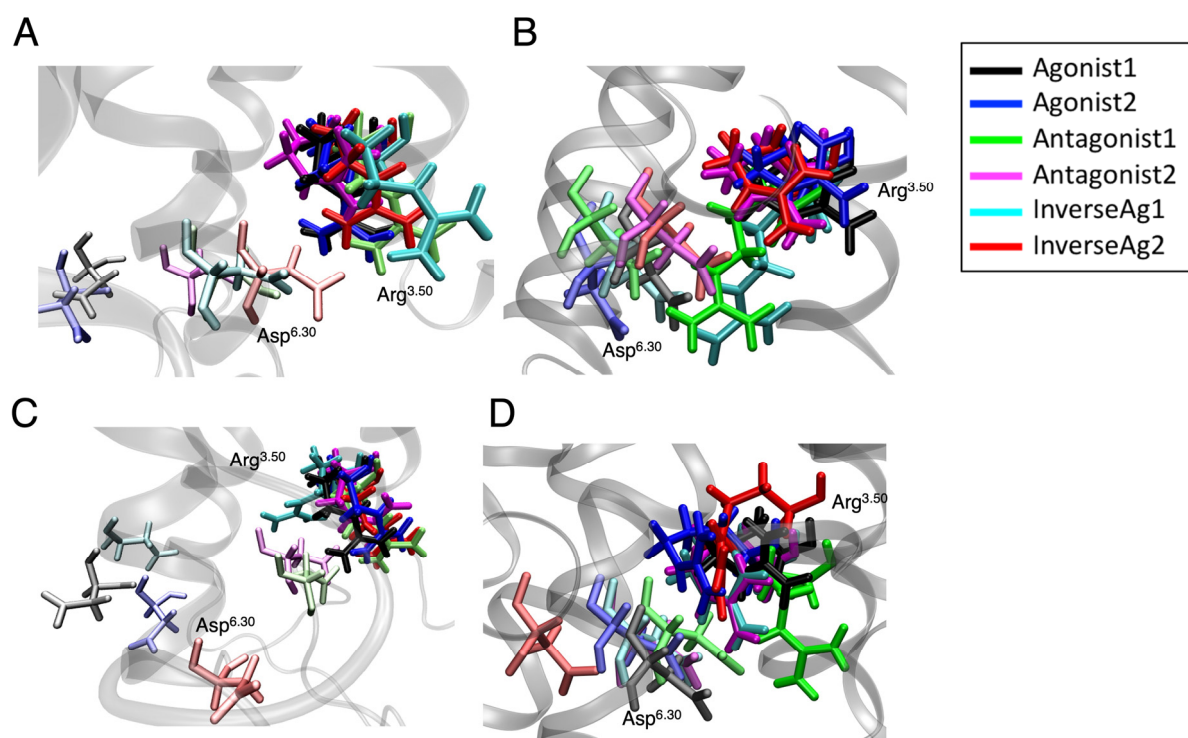

**Figure S8.** Positions of amino acid residues Arg<sup>3.50</sup> and Asp<sup>6.30</sup> participating in ionic lock at the end of 500ns MD simulations for (A) CB<sub>1</sub>R regular states (B) CB<sub>1</sub>R intermediate states, (C) CB<sub>2</sub>R regular states, and (D) CB<sub>2</sub>R intermediate states.

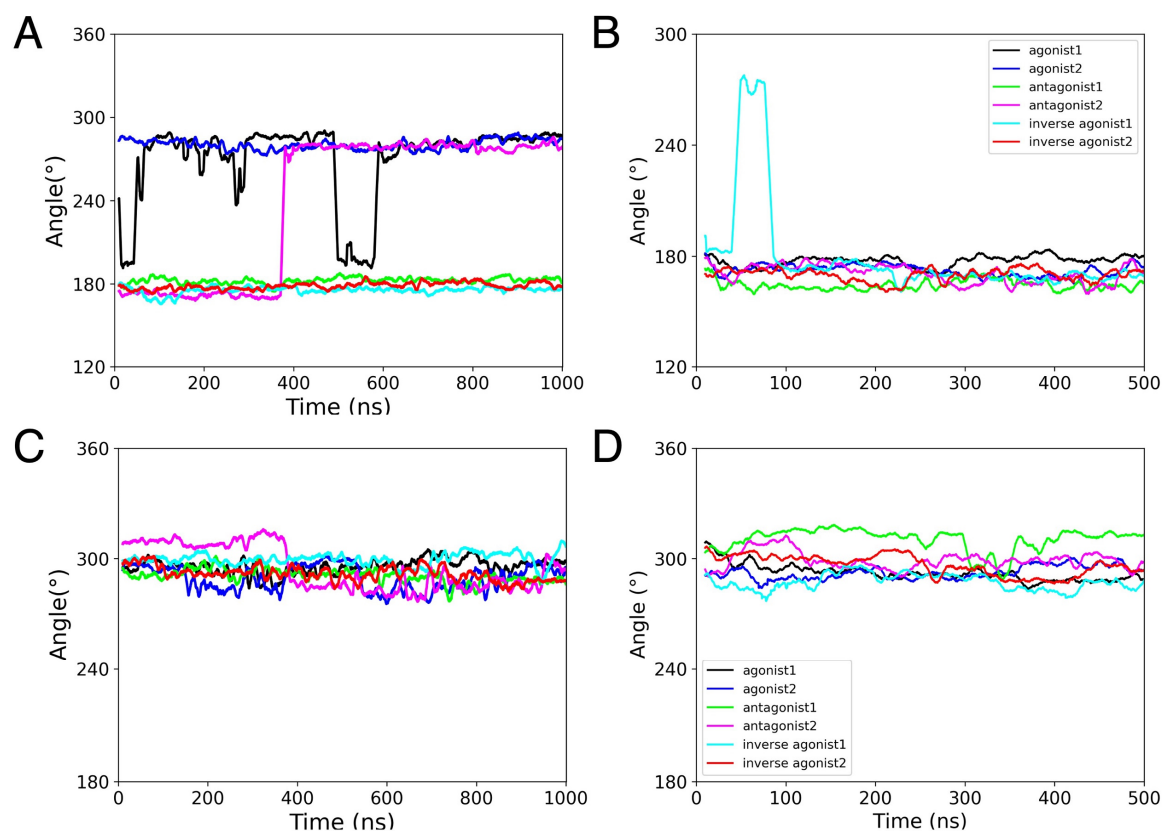

**Figure S9.** Dihedral angle of PHE<sup>3.36</sup> in (A) CB<sub>1</sub>R active and inactive states and (B) CB<sub>1</sub>R intermediate states; and dihedral angle of Trp<sup>6.48</sup> in (C) CB<sub>1</sub>R active and inactive states and (D) CB<sub>1</sub>R intermediate states.

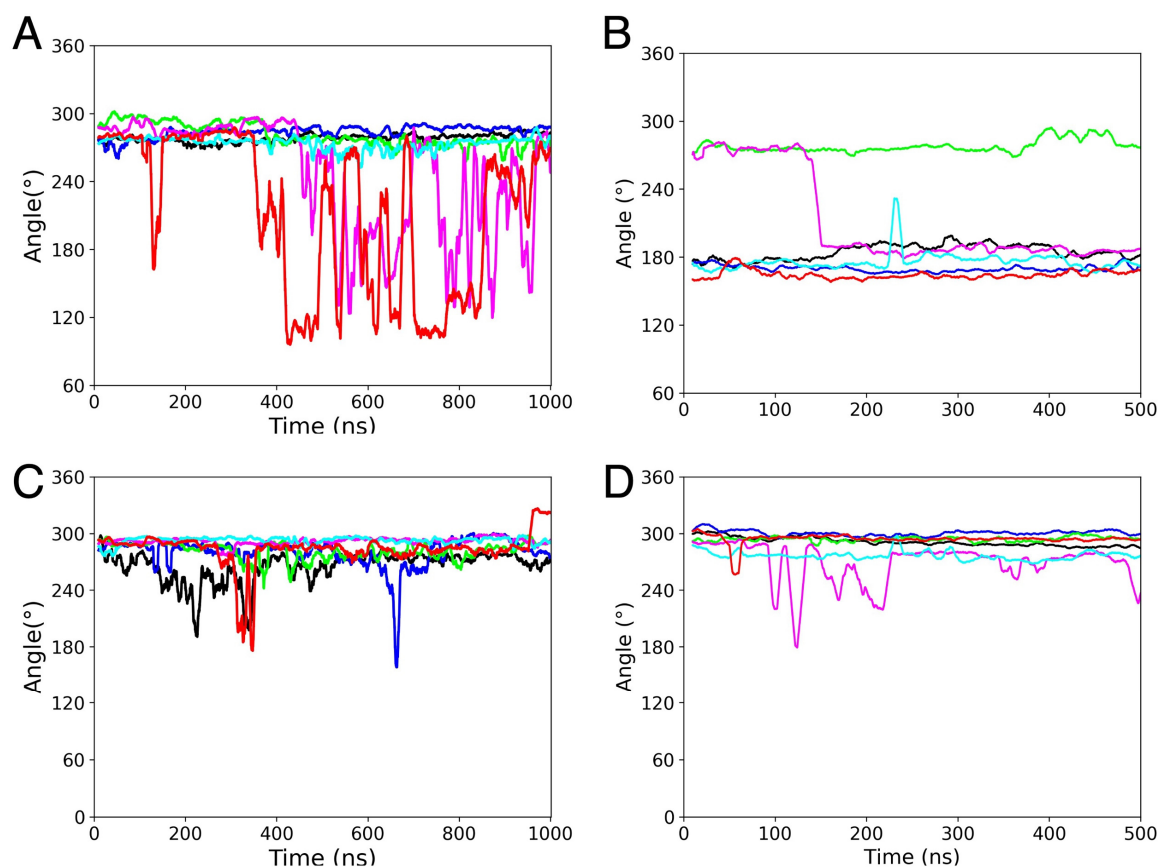

**Figure S10.** Dihedral angle of PHE<sup>3.36</sup> in (A) CB<sub>2</sub>R active and inactive states and (B) CB<sub>2</sub>R intermediate states; and dihedral angle of Trp<sup>6.48</sup> in (C) CB<sub>2</sub>R active and inactive states and (D) CB<sub>2</sub>R intermediate states.



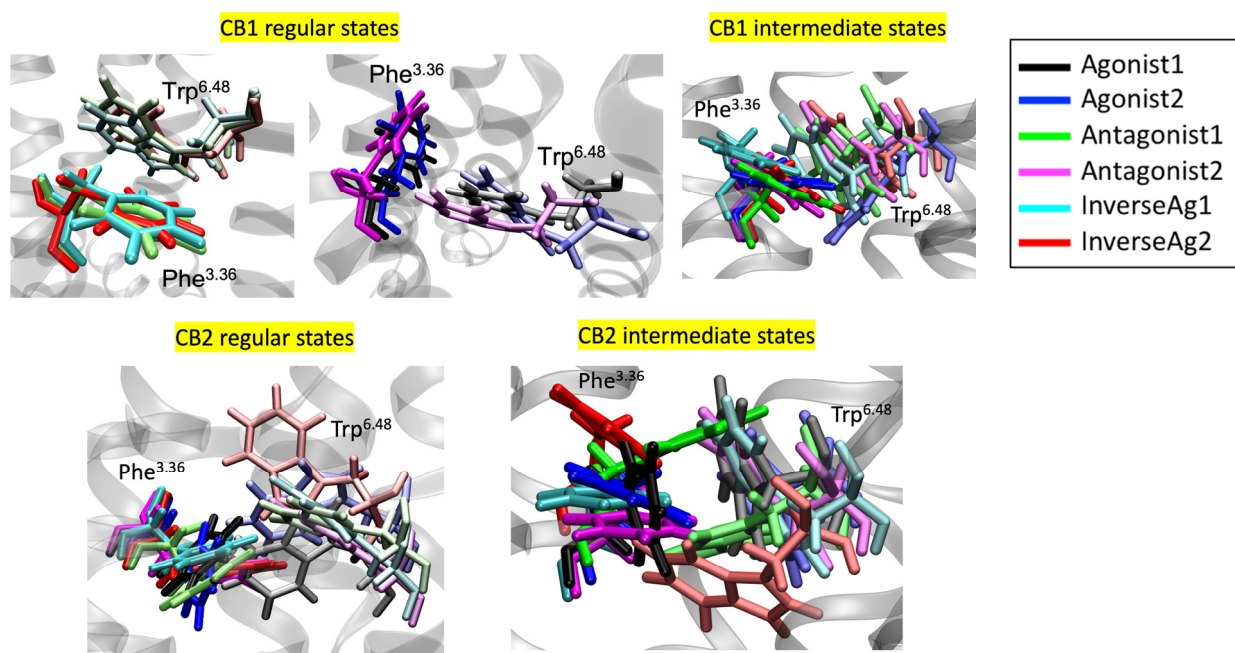

**Figure S11.** The orientations of Phe<sup>3.36</sup> and Trp<sup>6.48</sup> at the last MD simulation snapshot of CB<sub>1</sub>R and CB<sub>2</sub>R active, inactive, and intermediate states.

| Systems           | Simulation time (ns) | Total number of atoms | Number of water atoms |
|-------------------|----------------------|-----------------------|-----------------------|
| Agonist 1         | 1000                 | 44708                 | 25428                 |
| Agonist 2         | 1000                 | 44641                 | 25365                 |
| Antagonist 1      | 1000                 | 42142                 | 24798                 |
| Antagonist 2      | 1000                 | 42019                 | 24798                 |
| Inverse Agonist 1 | 1000                 | 38233                 | 22128                 |
| Inverse Agonist 2 | 1000                 | 38244                 | 22128                 |

**Table S1.** System details for the active and inactive states CB<sub>1</sub>R.

**Table S2.** System details for the intermediate states CB<sub>1</sub>R.

| Systems           | Simulation time (ns) | Total number of atoms | Number of water molecules |
|-------------------|----------------------|-----------------------|---------------------------|
| Agonist 1         | 500                  | 54743                 | 33966                     |
| Agonist 2         | 500                  | 54706                 | 33933                     |
| Antagonist 1      | 500                  | 58767                 | 37596                     |
| Antagonist 2      | 500                  | 58844                 | 37662                     |
| Inverse Agonist 1 | 500                  | 58691                 | 37503                     |
| Inverse Agonist 2 | 500                  | 58679                 | 37500                     |

**Table S3.** System details for the active and inactive states CB<sub>2</sub>R.

| Systems           | Simulation time (ns) | Total number of atoms | Number of water molecules |
|-------------------|----------------------|-----------------------|---------------------------|
| Agonist 1         | 1000                 | 38884                 | 23103                     |
| Agonist 2         | 1000                 | 38875                 | 23100                     |
| Antagonist 1      | 1000                 | 42664                 | 24492                     |
| Antagonist 2      | 1000                 | 42712                 | 24537                     |
| Inverse Agonist 1 | 1000                 | 38953                 | 23157                     |
| Inverse Agonist 2 | 1000                 | 38948                 | 23148                     |

**Table S4.** System details for the intermediate states CB<sub>2</sub>R.

| Syste38875ms      | Simulation time (ns) | Total number of atoms | Number of water molecules |
|-------------------|----------------------|-----------------------|---------------------------|
| Agonist 1         | 500                  | 48713                 | 30084                     |
| Agonist 2         | 500                  | 47975                 | 29754                     |
| Antagonist 1      | 500                  | 48258                 | 29880                     |
| Antagonist 2      | 500                  | 48383                 | 29868                     |
| Inverse Agonist 1 | 500                  | 48250                 | 29874                     |
| Inverse Agonist 2 | 500                  | 48924                 | 29874                     |
